# Supplementary material for: Overexpression of Sedoheptulose-1,7-Bisphosphatase Enhances Photosynthesis in Chlamydomonas reinhardtii and Has No Effect on the Abundance of Other Calvin-Benson Cycle Enzymes
Source: Front Plant Sci. 2020 Jun 23;11:868. doi: 10.3389/fpls.2020.00868 (PMC7324757; doi:10.3389/fpls.2020.00868)
Supplement: Supplementary file 3 [file Table_2.XLSX]

## Sheet: Legend
Supplemental Dataset 2
To obtain the amount of 14N native peptide in the sample, the ratio of 14N native / 15N Q-peptide determined by LC-MS was multiplied with the amount (in fmol) of Q-protein added to 10 µg of total cell proteins.
Four amounts of Q-prot were added per biological replicate (ranging from 0.0125 to 0.1 µg for replicates A-C, and from 0.025 to 0.2 µg for replicates D-F).
The mean amount of a peptide (in fmol/µg cell proteins) and standard deviation (SD) were calculated from all measurements.
The median from all values for all peptides was calculated. In case a peptide was revealed as clearly not quantotypic, its values were not included (TQLSQDELK from RPI1).
The amount of a peptide/protein per cell was caclulated from the amount of protein per cell determined (between 25.8 and 30.7 pg protein/ cell).
The percentage of a protein per cell was calculated from the molecular mass of the mature proteins (see Supplemental Dataset 1 for their sequences).

## Sheet: PGK1
			Calvin-Cycle QconCAT
	14N Input				Average A-F		14N Input		Rep:ABC	15N Input							Rep:DEF	15N Input
	Input: 10 µg Protein		pg protein/cell				Input: 10 µg Protein			47921.7	g/mol							47921.7	g/mol
	≈cellnumber			Mean	SD		≈cellnumber			0.1	0.05	0.025	0.0125	µg CBC-QconCAT				0.2	0.1	0.05	0.025	µg CBC-QconCAT
UVM4	361680		UVM4	27.6487	1.73102		361680		≡ fmol	2086.74	1043.37	521.684	260.842				≡ fmol	4173.47	2086.74	1043.37	521.684
HA5	387122		HA5	25.8317	0.513853		387122
HA11	374205		HA11	26.7233	3.85716		374205
St1	325468		St1	30.725	0.666054		325468
St12	356228		St12	28.0719	2.62779		356228
				Ratio 14N native peptide / 15N Q-peptide										Ratio 14N/15N * amount of Q-prot added
			µg QP	0.1/0.2	0.05/0.1	0.025/0.05	0.0125/0.025			PGK [Da]	42876.6		µg QP	fmol/µg cell prot				Mean	SD	Median	amol/cell (from mean)	SD	amol/cell (from median)	molecules/cell (from median)	% of total proteins	Conc [µM] in chloroplast
	UVM4	ADLNVPLDK	A	0.188977	0.377485	0.896559	1.75251				UVM4	ADLNVPLDK	A	39.4346	39.3856	46.7721	45.713
			B	0.194086	0.466235	1.13162	2.08092						B	40.5007	48.6455	59.0347	54.2792
			C	0.207711	0.464063	1.13519	1.84054						C	43.3437	48.4189	59.221	48.0089
			D	0.151064	0.303656	0.747594	1.35262						D	63.0463	63.3651	78.0016	70.5639
			E	0.140624	0.287582	0.775429	1.45529						E	58.689	60.0109	80.9058	75.9201
			F	0.143524	0.308749	0.776246	1.51466						F	59.8996	64.4277	80.991	79.0172	58.6498	13.5973		1.62159	0.375947
		LSELLGKPVTK	A	0.327285	0.591267	1.3635	2.62653					LSELLGKPVTK	A	68.2958	61.6909	71.1319	68.5109
			B	0.278685	0.699059	1.65749	3.28392						B	58.1543	72.9376	86.4686	85.6584
			C	0.309639	0.635511	1.65486	3.05597						C	64.6136	66.3072	86.3316	79.7126
			D	0.171595	0.354964	0.929022	1.81713						D	71.6149	74.0716	96.9312	94.7969
			E	0.143124	0.284522	0.908445							E	59.7326	59.3723	94.7843
			F	0.153261	0.424683	0.993374	1.83777						F	63.963	88.6201	103.645	95.8733	77.0965	14.0822		2.13162	0.389356
		TFNDALADAK	A	0.311461	0.613371	1.47681	3.14674					TFNDALADAK	A	64.9936	63.9972	77.0428	82.0804
			B	0.307076	0.721135	1.91204	3.57384						B	64.0786	75.241	99.7484	93.2208
			C	0.321329	0.703162	1.79714	3.39487						C	67.053	73.3657	93.7542	88.5526
			D	0.19449	0.402952	1.00983	2.05155						D	81.1701	84.0854	105.363	107.026
			E	0.172744	0.353727	1.02699	2.00227						E	72.0942	73.8136	107.152	104.455
			F	0.193127	0.410398	1.03823	1.95078						F	80.6011	85.6392	108.325	101.769	85.6093	15.0222	72.9376	2.36699	0.415344	2.01663	1.21444e+06	0.312732	14.938
	HA5	ADLNVPLDK	A	0.200488	0.408744	1.04668	1.85051				HA5	ADLNVPLDK	A	41.8365	42.6471	54.6038	48.2692
			B	0.172558	0.391732	0.957273	1.62153						B	36.0083	40.872	49.9394	42.2964
			C	0.201862	0.514374	0.836636	1.25136						C	42.1234	53.6682	43.646	32.6409
			D	0.127405	0.254874	0.644306	1.1747						D	53.1721	53.1854	67.2248	61.2823
			E	0.127639	0.243921	0.683876	1.35905						E	53.2699	50.9	71.3535	70.8994
			F	0.119599	0.241521	0.63352	1.26941						F	49.9142	50.3992	66.0995	66.2232	51.7698	10.8275		1.3373	0.279691
		LSELLGKPVTK	A	0.333593	0.632064	1.63123	3.07181					LSELLGKPVTK	A	69.6122	65.9475	85.0985	80.1256
			B	0.269878	0.603247	1.42677	2.24392						B	56.3165	62.9409	74.4323	58.531
			C	0.314254	0.807907	1.45823	2.14371						C	65.5766	84.2945	76.0737	55.9169
			D	0.118371	0.282274	0.795244	1.39023						D	49.4019	58.9032	82.9733	72.5262
			E	0.142222	0.256903	0.767019	1.55207						E	59.3558	53.6089	80.0283	80.9691
			F	0.116798	0.229389	0.755826	1.47034						F	48.7453	47.8675	78.8605	76.7055	67.7005	12.2609		1.74882	0.31672
		TFNDALADAK	A	0.333904	0.698717	1.78963	3.39108					TFNDALADAK	A	69.6769	72.9019	93.3621	88.4536
			B	0.294394	0.644622	1.62756	2.92488						B	61.4322	67.2579	84.9072	76.2933
			C	0.354437	0.855423	1.48615	2.48599						C	73.9617	89.2522	77.5302	64.845
			D	0.141848	0.349186	0.844229	1.7811						D	59.1998	72.8659	88.0842	92.9171
			E	0.157039	0.314054	0.899278	1.74277						E	65.5397	65.5347	93.8278	90.9178
			F	0.158882	0.30542	0.845363	1.78148						F	66.309	63.7332	88.2026	92.9372	77.4976	11.9613	65.7621	2.00189	0.30898	1.69874	1.02301e+06	0.281965
	HA11	ADLNVPLDK	A	0.193479	0.416839	0.911055	1.72365				HA11	ADLNVPLDK	A	40.3739	43.4917	47.5283	44.9601
			B	0.192532	0.395989	0.884417	1.73669						B	40.1765	41.3162	46.1386	45.3001
			C	0.196561	0.388169	0.893274	1.91002						C	41.0171	40.5003	46.6007	49.8213
			D	0.118207	0.246249	0.650618	1.39189						D	49.3333	51.3856	67.8835	72.6126
			E	0.145833	0.16921	0.770006	1.42561						E	60.863	35.3097	80.34	74.3716
			F	0.132949	0.270654	0.702216	1.36536						F	55.4857	56.4784	73.267	71.2289	53.1577	13.2936		1.42055	0.355249
		LSELLGKPVTK	A	0.307419	0.628103	1.40617	2.90955					LSELLGKPVTK	A	64.1503	65.5343	73.3579	75.8934
			B	0.301357	0.664201	1.42406	3.1628						B	62.8852	69.3006	74.291	82.499
			C	0.286595	0.589522	1.45202	3.45495						C	59.8049	61.5089	75.7497	90.1196
			D	0.128841	0.288894	0.801965	1.53457						D	53.7714	60.2845	83.6746	80.0561
			E	0.148848	0.204209	0.948866							E	62.1214	42.6131	99.0017
			F	0.134107	0.339004	0.892355	1.76235						F	55.9693	70.7412	93.1056	91.9391	71.6684	14.122		1.91522	0.377387
		TFNDALADAK	A	0.313259	0.648262	1.43617	3.34589					TFNDALADAK	A	65.3689	67.6376	74.923	87.2749
			B	0.315548	0.664649	1.55146	3.26311						B	65.8466	69.3474	80.9374	85.1157
			C	0.303977	0.615956	1.5496	3.68892						C	63.4321	64.2669	80.8401	96.2225
			D	0.14008	0.321643	0.928821	1.8714						D	58.4619	67.1185	96.9103	97.6279
			E	0.171761	0.193791	1.06474	2.0876						E	71.6841	40.4391	111.091	108.907
			F	0.15765	0.363096	0.93049	1.90443						F	65.7948	75.7685	97.0845	99.3509	78.8105	17.5542	67.1185	2.10608	0.469106	1.79363	1.08015e+06	0.287781
	St1	ADLNVPLDK	A	0.198814	0.485149	0.967237					St1	ADLNVPLDK	A	41.4874	50.6189	50.4593
			B	0.225136	0.527911	1.02224	1.98889						B	46.9799	55.0806	53.3285	51.8786
			C	0.18215	0.431151	0.96803	1.8474						C	38.0099	44.9849	50.5006	48.1881
			D	0.1606	0.302232	0.720501	1.40895						D	67.026	63.068	75.1748	73.5027
			E	0.150139	0.300235	0.772349	1.57954						E	62.66	62.6512	80.5845	82.402
			F	0.136238	0.294748	0.697276	0.993758						F	56.8587	61.5062	72.7516	51.8428	58.3281	12.3449		1.79213	0.379298
		LSELLGKPVTK	A	0.295895	0.736295	1.54118						LSELLGKPVTK	A	61.7456	76.8227	80.4011
			B	0.337994	0.850131	1.69887	3.14826						B	70.5304	88.7	88.6272	82.1199
			C	0.293236	0.718958	1.52601	3.32049						C	61.1907	75.0138	79.6094	86.6123
			D	0.145252	0.330772	0.930986	1.64603						D	60.6207	69.0233	97.1361	85.8708
			E	0.147293	0.351884	0.743779	1.26616						E	61.4725	73.4289	77.6036	66.0534
			F	0.119173	0.309356	0.78485	1.22702						F	49.7364	64.5545	81.8887	64.0119	74.0337	11.7087		2.27468	0.359749
		TFNDALADAK	A	0.325962	0.768086	1.64643						TFNDALADAK	A	68.0198	80.1397	85.8915
			B	0.358417	0.827589	1.81368	3.51723						B	74.7922	86.348	94.6167	91.7443
			C	0.306114	0.784939	1.60552	3.48235						C	63.8779	81.898	83.7573	90.8344
			D	0.188962	0.387213	1.15095	1.88747						D	78.8628	80.8012	120.086	98.4664
			E	0.18899	0.395696	1.03459	2.11558						E	78.8746	82.5715	107.946	110.366
			F	0.164187	0.371755	0.95168	1.57814						F	68.5231	77.5755	99.2953	82.329	86.4182	13.8515	74.7922	2.6552	0.425587	2.29799	1.38388e+06	0.320684
	St12	ADLNVPLDK	A	0.203102	0.456781	1.17029	1.92066				St12	ADLNVPLDK	A	42.3821	47.6591	61.0521	50.0988
			B	0.193982	0.494163	1.04458	1.83455						B	40.4789	51.5595	54.494	47.8527
			C	0.176763	0.39597	0.894582	1.52335						C	36.8858	41.3142	46.669	39.7355
			D	0.136997	0.286157	0.748516	1.27747						D	57.1752	59.7134	78.0979	66.6436
			E	0.148903	0.275546	0.746816	1.49589						E	62.1443	57.4991	77.9205	78.0382
			F	0.135596	0.252082	0.737703	1.38176						F	56.5905	52.603	76.9696	72.0842	56.4859	13.0298		1.58567	0.365773
		LSELLGKPVTK	A	0.314249	0.719208	1.7884	3.41785					LSELLGKPVTK	A	65.5755	75.0399	93.2981	89.152
			B	0.309747	0.821558	1.68016	2.91748						B	64.636	85.7188	87.6513	76.1002
			C	0.301503	0.623812	1.49173	2.70542						C	62.9157	65.0866	77.8214	70.5687
			D	0.145554	0.306953	0.837574	1.55569						D	60.7464	64.0531	87.3899	81.1577
			E	0.129308	0.302456	0.818656	1.71978						E	53.9662	63.1147	85.416	89.7184
			F	0.132993	0.313373	0.77696	1.615						F	55.5044	65.3928	81.0656	84.2518	74.3892	11.9572		2.08825	0.335663
		TFNDALADAK	A	0.336292	0.719416	1.98878	3.96655					TFNDALADAK	A	70.1752	75.0616	103.752	103.464
			B	0.33125	0.850449	1.83404	3.44933						B	69.1232	88.7332	95.6789	89.9732
			C	0.296943	0.663377	1.6514	3.11561						C	61.9641	69.2147	86.1508	81.2683
			D	0.163422	0.346581	0.910511	1.77988						D	68.2037	72.3224	94.9998	92.8534
			E	0.176608	0.336238	0.918731	1.98537						E	73.707	70.164	95.8575	103.574
			F	0.161687	0.334826	0.971293	1.80827						F	67.4797	69.8694	101.342	94.3346	83.3028	13.9048	70.1696	2.33847	0.390336	1.9698	1.18624e+06	0.300863

## Sheet: GAP3
		Calvin-Cycle QconCAT
					ABC	14N Input			15N Input							DEF	15N Input
		pg protein/cell				Input: 10 µg Protein			47921.7	g/mol							47921.7	g/mol
			Mean	SD		≈cellnumber			0.1	0.05	0.025	0.0125	µg CBC-QconCAT				0.2	0.1	0.05	0.025	µg CBC-QconCAT
		UVM4	27.6487	1.73102		361680		≡ fmol	2086.74	1043.37	521.684	260.842				≡ fmol	4173.47	2086.74	1043.37	521.684
		HA5	25.8317	0.513853		387122
		HA11	26.7233	3.85716		374205
		St1	30.725	0.666054		325468
		St12	28.0719	2.62779		356228
			Ratio 14N native peptide / 15N Q-peptide										Ratio 14N/15N * amount of Q-prot added
		µg QP	0.1/0.2	0.05/0.1	0.025/0.05	0.0125/0.025			GAP3 [Da]	38089.9		µg QP	fmol/µg cell prot				Mean	SD	Median	amol/cell (from mean)	SD	amol/cell (from median)	molecules/cell (from median)	% of total proteins	Conc [µM] in chloroplast
UVM4	AVSLVLPSLK	A	0.839137	1.60832	4.39762	8.46543				UVM4	AVSLVLPSLK	A	175.106	167.807	229.417	220.814
		B	0.90475	2.02931	5.17565	10.1848						B	188.797	211.732	270.006	265.662
		C	0.830719	1.81591	5.12129	9.16824						C	173.349	189.466	267.17	239.146
		D	0.531607	1.16469	3.03192	5.8521						D	221.865	243.04	316.341	305.295
		E	0.5328	1.09281	3.11707	6.12787						E	222.363	228.04	325.225	319.682
		F	0.50601	1.30582	3.19996	6.16695						F	211.182	272.491	333.874	321.72	246.65	52.5147		6.81955	1.45197
	VLITAPAK	A	1.02098	1.99163	5.3177	10.4551					VLITAPAK	A	213.051	207.8	277.416	272.714
		B	0.932495	2.28622	5.87393	11.3546						B	194.587	238.537	306.434	296.177
		C	0.969802	2.13126	5.45886	10.7676						C	202.372	222.369	284.78	280.865
		D										D
		E										E
		F										F					249.758	40.5935		6.9055	1.12236
		A										A
		B										B
		C										C
		D										D
		E										E
		F										F							238.841	0	0	6.60366	3.97682e+06	0.909744	48.916
HA5	AVSLVLPSLK	A	0.769186	1.69532	4.44332	8.50307				HA5	AVSLVLPSLK	A	160.509	176.885	231.801	221.796
		B	0.737726	1.64538	4.21278	7.00073						B	153.944	171.674	219.774	182.608
		C	0.850341	2.09186	3.7247	6.18534						C	177.444	218.258	194.312	161.34
		D	0.444096	0.977234	2.47654	4.94293						D	185.342	203.923	258.394	257.865
		E	0.415558	0.969672	2.86614	5.25953						E	173.432	202.345	299.044	274.381
		F	0.467729	0.974641	2.82479	5.6212						F	195.205	203.382	294.73	293.249	212.985	44.8502		5.50176	1.15855
	VLITAPAK	A	0.937089	1.99671	5.3629	10.1608					VLITAPAK	A	195.546	208.331	279.774	265.038
		B	0.895583	1.95138	4.83102	8.9311						B	186.885	203.601	252.027	232.961
		C	1.02816	2.51947	4.5743	7.53015						C	214.551	262.874	238.634	196.418
		D										D
		E										E
		F										F					228.053	31.461		5.891	0.81269
		A										A	0	0	0	0	0	0
		B										B	0	0	0	0
		C										C	0	0	0	0
		D										D	0	0	0	0
		E										E	0	0	0	0
		F										F	0	0	0	0			206.127	0	0	5.3246	3.20655e+06	0.785134
HA11	AVSLVLPSLK	A	0.783114	1.6743	3.16443	8.48166				HA11	AVSLVLPSLK	A	163.415	174.692	165.083	221.237
		B	0.759275	1.73908	3.72888	8.77759						B	158.441	181.45	194.53	228.957
		C	0.76722	1.59465	3.97252	9.86456						C	160.099	166.381	207.24	257.309
		D	0.423232	1.0907	2.8949	5.72827						D	176.635	227.599	302.045	298.835
		E	0.535855	0.652746	3.29616	6.31139						E	223.638	136.211	343.911	329.255
		F	0.473788	1.14175	2.99018	5.86151						F	197.734	238.254	311.986	305.786	223.78	61.7887		5.98015	1.6512
	VLITAPAK	A	0.964634	2.02685	4.7069	10.6584					VLITAPAK	A	201.294	211.475	245.551	278.016
		B	0.928399	2.1325	4.69914	11.2184						B	193.733	222.498	245.147	292.624
		C	0.919703	1.90858	4.90515	11.9957						C	191.918	199.136	255.894	312.898
		D										D
		E										E
		F										F					237.515	41.0157		6.3472	1.09608
		A										A	0	0	0	0	0	0
		B										B	0	0	0	0
		C										C	0	0	0	0
		D										D	0	0	0	0
		E										E	0	0	0	0
		F										F	0	0	0	0			221.868	0	0	5.92905	3.57055e+06	0.845092
St1	AVSLVLPSLK	A	0.775458	1.92286	3.94996					St1	AVSLVLPSLK	A	161.818	200.625	206.063
		B	0.863667	2.09499	4.47234	8.41885						B	180.225	218.585	233.315	219.599
		C	0.755368	1.83768	3.96712	8.2437						C	157.626	191.738	206.958	215.03
		D	0.50761	1.10977	2.90933	5.74242						D	211.85	231.58	303.55	299.573
		E	0.526845	1.22323	3.16156	5.42449						E	219.877	255.256	329.867	282.987
		F	0.475843	1.04204	2.75353	4.18592						F	198.592	217.447	287.295	218.373	228.166	45.1547		7.01041	1.38738
	VLITAPAK	A	0.926246	2.29397	4.90909						VLITAPAK	A	193.283	239.346	256.1
		B	1.03522	2.54602	5.46209	10.2859						B	216.023	265.644	284.949	268.299
		C	0.930684	2.44941	4.71178	10.614						C	194.209	255.564	245.806	276.857
		D										D
		E										E
		F										F					245.098	31.5295		7.53063	0.968742
		A										A
		B										B
		C										C
		D										D
		E										E
		F										F							219.738	0	0	6.75145	4.06582e+06	0.83698
St12	AVSLVLPSLK	A	0.853449	1.91884	5.50272	9.83983				St12	AVSLVLPSLK	A	178.092	200.205	287.068	256.664
		B	0.856674	2.27821	4.89687	8.46875						B	178.765	237.701	255.462	220.901
		C	0.773404	1.70676	4.3037	7.59842						C	161.389	178.078	224.517	198.199
		D	0.52782	1.11393	2.88809	5.37801						D	220.284	232.448	301.334	280.562
		E	0.518789	1.07309	2.95722	5.98712						E	216.515	223.926	308.548	312.339
		F	0.430689	0.940192	2.8513	5.47268						F	179.747	196.193	297.495	285.501	234.664	47.1381		6.58747	1.32326
	VLITAPAK	A	1.11794	2.38408	6.40859	12.6289					VLITAPAK	A	233.285	248.747	334.326	329.416
		B	1.052	2.84956	5.96801	11.1426						B	219.525	297.314	311.342	290.645
		C	0.967202	2.1232	5.43632	10.0945						C	201.83	221.528	283.604	263.306
		D										D
		E										E
		F										F					269.572	44.8445		7.56741	1.25887
		A										A
		B										B
		C										C
		D										D
		E										E
		F										F							235.493	0	0	6.61074	3.98108e+06	0.89699

## Sheet: FBA3
		Calvin-Cycle QconCAT
					ABC	14N Input			15N Input							DEF	15N Input
		pg protein/cell				Input: 10 µg Protein			47921.7	g/mol							47921.7	g/mol
			Mean	SD		≈cellnumber			0.1	0.05	0.025	0.0125	µg CBC-QconCAT				0.2	0.1	0.05	0.025	µg CBC-QconCAT
		UVM4	27.6487	1.73102		361680		≡ fmol	2086.74	1043.37	521.684	260.842				≡ fmol	4173.47	2086.74	1043.37	521.684
		HA5	25.8317	0.513853		387122
		HA11	26.7233	3.85716		374205
		St1	30.725	0.666054		325468
		St12	28.0719	2.62779		356228
			Ratio 14N native peptide / 15N Q-peptide										Ratio 14N/15N * amount of Q-prot added
		µg QP	0.1/0.2	0.05/0.1	0.025/0.05	0.0125/0.025			FBA3 [Da]	38168.6		µg QP	fmol/µg cell prot				Mean	SD	Median	amol/cell (from mean)	SD	amol/cell (from median)	molecules/cell (from median)	% of total proteins	Conc [µM] in chloroplast
UVM4	ALQNTVLK	A	1.73459	3.38125	9.85004	18.8409				UVM4	ALQNTVLK	A	361.964	352.789	513.861	491.449
		B	1.55122	3.91102	10.4307	21.6977						B	323.7	408.064	544.152	565.968
		C	1.74998	3.65125	10.6041	21.7149						C	365.174	380.96	553.198	566.416
		D	1.00989	2.15307	3.54366	5.08947						D	421.474	449.288	369.734	265.509
		E	1.04606	1.94489	3.63128	4.84814						E	436.571	405.847	378.876	252.92
		F	1.12117	2.18659	3.7884	5.61046						F	467.918	456.284	395.27	292.689	417.503	90.7133		11.5434	2.50811
	SVVSIPHGPSIIAAR	A	1.22944	2.74249	7.16991	12.2797					SVVSIPHGPSIIAAR	A	256.552	286.143	374.043	320.307
		B	1.11462	2.90328	7.43466	14.2442						B	232.591	302.92	387.855	371.55
		C	1.12017	2.69294	7.87254	14.1326						C	233.749	280.973	410.698	368.637
		D	0.579381	1.38616	3.38708	6.58153						D	241.803	289.256	353.397	343.348
		E	0.630881	1.2444	3.54035	7.0733						E	263.296	259.674	369.389	369.003
		F	0.653649	1.57653	3.39256	6.5431						F	272.799	328.981	353.97	341.343	317.178	53.9658		8.76957	1.49208
		A										A
		B										B
		C										C
		D										D
		E										E
		F										F					#DIV/0!	#DIV/0!	366.905	#DIV/0!	#DIV/0!	10.1445	6.10914e+06	1.40043	75.1442
HA5	ALQNTVLK	A	1.62327	3.70087	11.5503	19.2462				HA5	ALQNTVLK	A	338.734	386.137	602.564	502.023
		B	1.56185	3.25444	9.41083	17.4577						B	325.916	339.558	490.948	455.369
		C	1.79137	4.53358	9.35535	12.4886						C	373.811	473.02	488.054	325.756
		D	0.980457	1.87691	3.40013	4.85925						D	409.191	391.662	354.759	253.5
		E	1.01709	1.79332	3.40347	4.79868						E	424.48	374.219	355.108	250.34
		F	1.00282	1.82066	3.49252	4.8749						F	418.523	379.924	364.398	254.316	388.846	84.6325		10.0445	2.1862
	SVVSIPHGPSIIAAR	A	1.10878	2.40283	6.89133	11.7776					SVVSIPHGPSIIAAR	A	231.373	250.704	359.51	307.208
		B	0.819233	2.17214	6.01644	13.1094						B	170.952	226.634	313.868	341.948
		C	0.9973	2.66963	4.64816	8.20548						C	208.11	278.541	242.487	214.034
		D	0.517042	1.14437	3.23943	5.72841						D	215.786	238.8	337.992	298.842
		E	0.546695	1.03871	2.66321	6.03811						E	228.162	216.752	277.871	314.999
		F	0.494843	1.07547	2.87304	5.86014						F	206.521	224.422	299.764	305.714	262.958	51.4839		6.79265	1.32991
		A										A
		B										B
		C										C
		D										D
		E										E
		F										F					#DIV/0!	#DIV/0!	320.377	#DIV/0!	#DIV/0!	8.27588	4.98385e+06	1.22283
HA11	ALQNTVLK	A	1.86358	4.30542	10.8016	20.7883				HA11	ALQNTVLK	A	388.881	449.214	563.503	542.247
		B	1.7759	4.21804	9.47067	22.3491						B	370.585	440.097	494.07	582.959
		C	1.70777	3.61635	9.75131	21.9466						C	356.367	377.319	508.711	572.461
		D	0.914973	1.78865	3.40911	4.80704						D	381.862	373.244	355.696	250.776
		E	1.13308	1.39572	3.81653	4.99946						E	472.89	291.25	398.205	260.814
		F	0.991318	2.3418	3.34819	4.80843						F	413.724	488.672	349.34	250.848	413.905	99.6303		11.0609	2.66245
	SVVSIPHGPSIIAAR	A	1.1418	2.33685	5.51324	12.2767					SVVSIPHGPSIIAAR	A	238.265	243.819	287.617	320.228
		B	1.01921	2.5842	5.58965	15.8852						B	212.683	269.627	291.603	414.354
		C	0.959954	2.11611	5.29012							C	200.317	220.788	275.977
		D	0.484414	1.06275	2.84302	5.43773						D	202.169	221.769	296.631	283.678
		E	0.583077	0.851313	3.47456	6.07178						E	243.346	177.647	362.525	316.755
		F	0.549228	1.2065	2.9148	5.59804						F	229.219	251.766	304.121	292.041	267.693	55.4988		7.15365	1.48311
		A										A
		B										B
		C										C
		D										D
		E										E
		F										F					#DIV/0!	#DIV/0!	316.755	#DIV/0!	#DIV/0!	8.46475	5.09759e+06	1.20901
St1	ALQNTVLK	A	1.81272	4.73245	10.208					St1	ALQNTVLK	A	378.268	493.769	532.538
		B	2.35023	5.48425	10.7829	21.2389						B	490.431	572.21	562.526	554
		C	1.85592	4.74199	10.1366	20.0032						C	387.282	494.765	528.812	521.767
		D	1.36954	2.02647	3.35043	5.22866						D	571.575	422.871	349.573	272.771
		E	1.16705	2.15266	3.88884	4.98051						E	487.066	449.204	405.749	259.826
		F	1.08659	2.10947	3.61019	8.31825						F	453.486	440.192	376.676	433.95	453.883	88.7099		13.9455	2.72561
	SVVSIPHGPSIIAAR	A	1.00309	2.28478	4.72884						SVVSIPHGPSIIAAR	A	209.319	238.387	246.696
		B	1.02823	2.6794	4.91087	11.1161						B	214.565	279.56	256.192	289.954
		C	0.807432	2.1652	4.23912	9.48342						C	168.49	225.91	221.148	247.368
		D	0.660722	1.26131	3.26229	6.69598						D	275.751	263.202	340.377	349.319
		E	0.709793	1.38625	3.40198	6.25965						E	296.23	289.274	354.952	326.556
		F	0.56755	1.42476	3.1748	2.83043						F	236.865	297.31	331.249	147.659	265.493	55.1934		8.15726	1.69581
		A										A
		B										B
		C										C
		D										D
		E										E
		F										F					#DIV/0!	#DIV/0!	344.848	#DIV/0!	#DIV/0!	10.5954	6.38073e+06	1.31624
St12	ALQNTVLK	A	2.13212	4.27478	13.2929	21.2066				St12	ALQNTVLK	A	444.917	446.017	693.471	553.158
		B	2.00875	4.99933	10.3725	19.8924						B	419.173	521.614	541.116	518.878
		C	1.81327	3.91891	10.3433	19.255						C	378.382	408.886	539.594	502.253
		D	1.09478	1.91949	3.54307	4.90818						D	456.905	400.547	369.673	256.052
		E	1.12839	1.95035	3.22704	5.2166						E	470.93	406.986	336.7	272.142
		F	1.01133	1.70845	3.38142	4.94241						F	422.076	356.509	352.806	257.838	430.276	103.533		12.0787	2.90637
	SVVSIPHGPSIIAAR	A	1.23737	2.69744	6.92152	12.9076					SVVSIPHGPSIIAAR	A	258.207	281.442	361.085	336.685
		B	1.16499	2.62804	5.91002	11.4178						B	243.102	274.202	308.316	297.824
		C	1.01734	1.8978	5.35209	9.01848						C	212.292	198.011	279.21	235.24
		D	0.519283	1.17326	2.80632	5.71573						D	216.722	244.829	292.803	298.181
		E	0.547419	1.21902	2.8099	5.55399						E	228.464	254.378	293.177	289.743
		F	0.535611	1.14312	3.25743	5.61536						F	223.536	238.538	339.87	292.944	270.783	42.7467		7.60141	1.19998
		A										A
		B										B
		C										C
		D										D
		E										E
		F										F					#DIV/0!	#DIV/0!	322.501	#DIV/0!	#DIV/0!	9.05321	5.45197e+06	1.23094

## Sheet: FBP1
		Calvin-Cycle QconCAT
					ABC	14N Input			15N Input							DEF	15N Input
		pg protein/cell				Input: 10 µg Protein			47921.7	g/mol							47921.7	g/mol
			Mean	SD		≈cellnumber			0.1	0.05	0.025	0.0125	µg CBC-QconCAT				0.2	0.1	0.05	0.025	µg CBC-QconCAT
		UVM4	27.6487	1.73102		361680		≡ fmol	2086.74	1043.37	521.684	260.842				≡ fmol	4173.47	2086.74	1043.37	521.684
		HA5	25.8317	0.513853		387122
		HA11	26.7233	3.85716		374205
		St1	30.725	0.666054		325468
		St12	28.0719	2.62779		356228
	Ratios 14N/15N		Ratio 14N native peptide / 15N Q-peptide										Ratio 14N/15N * amount of Q-prot added
		µg QP	0.1/0.2	0.05/0.1	0.025/0.05	0.0125/0.025			FBP1 [Da]	38928.2		µg QP	fmol/µg cell prot				Mean	SD	Median	amol/cell (from mean)	SD	amol/cell (from median)	molecules/cell (from median)	% of total proteins	Conc [µM] in chloroplast
UVM4	IYSFNEGNYGLWDDSVK	A	0.115525	0.190129	0.445355	0.980194				UVM4	IYSFNEGNYGLWDDSVK	A	24.1071	19.8375	23.2335	25.5676
		B	0.0942142	0.204216	0.548081	1.1066						B	19.66	21.3072	28.5925	28.8649
		C	0.0886321	0.202015	0.479336	0.911077						C	18.4952	21.0777	25.0062	23.7647
		D	0.236262	0.572053	1.09418	2.00189						D	98.6032	119.372	114.164	104.436
		E	0.251343	0.469424	1.29655	2.40167						E	104.898	97.9564	135.278	125.291
		F	0.286805	0.501361	1.1883	2.08048						F	119.697	104.621	123.984	108.535	68.1812	46.6261		1.88512	1.28915
	TLLYGGIYGYPGDAK	A	0.0467853	0.136503	0.322607	0.588268					TLLYGGIYGYPGDAK	A	9.76285	14.2423	16.8299	15.3445
		B	0.0852694	0.150072	0.354452	0.621275						B	17.7935	15.658	18.4912	16.2055
		C	0.0724353	0.140658	0.356072	0.589016						C	15.1153	14.6758	18.5757	15.364
		D	0.054864		0.203268	0.40308						D	22.8973		21.2084	21.0281
		E	0.0527801	0.0858184	0.211748	0.404274						E	22.0277	17.908	22.0931	21.0903
		F	0.0414661	0.0637184	0.202733	0.4397						F	17.3058	13.2963	21.1525	22.9385	17.8698	3.49387		0.494076	0.096601
	VPLFIGSK	A	0.0286797	0.0560376	0.152974	0.290533					VPLFIGSK	A	5.9847	5.84678	7.98041	7.57831
		B	0.0300073	0.0729425	0.178026	0.288278						B	6.26174	7.61059	9.28734	7.5195
		C	0.0278827	0.0384291	0.181303	0.295604						C	5.81838	4.00957	9.45827	7.71059
		D										D
		E										E
		F										F					7.08885	1.56287	19.8375	0.195998	0.0432114	0.548481	330303	0.0772236	4.06282
HA5	IYSFNEGNYGLWDDSVK	A	0.203144	0.170592	0.453017	0.746942				HA5	IYSFNEGNYGLWDDSVK	A	42.3908	17.7991	23.6332	19.4834
		B	0.076341	0.156165	0.447694	0.695698						B	15.9304	16.2937	23.3555	18.1467
		C	0.0824412	0.222128	0.396982	0.626517						C	17.2033	23.1761	20.7099	16.3422
		D	0.226004	0.415005	0.972412	2.10693						D	94.3222	86.6006	101.458	109.915
		E	0.241826	0.406106	0.977874	1.97538						E	100.926	84.7436	102.028	103.052
		F	0.196519	0.410276	0.962127	1.95775						F	82.0169	85.6139	100.385	102.133	58.6525	39.0905		1.51509	1.00977
	TLLYGGIYGYPGDAK	A	0.266654	0.138431	0.384853	0.539741					TLLYGGIYGYPGDAK	A	55.6437	14.4435	20.0772	14.0787
		B	0.0172505	0.11569	0.330141	0.494993						B	3.59972	12.0707	17.2229	12.9115
		C	0.094438	0.16986	0.155418	0.363271						C	19.7067	17.7226	8.1079	9.47565
		D	0.0534248	0.0875654	0.331632	0.397039						D	22.2967	18.2726	34.6014	20.7129
		E	0.126199	0.092464	0.216311	0.367512						E	52.6687	19.2948	22.5692	19.1725
		F	0.0432985	0.0866226	0.212778	0.403211						F	18.0705	18.0759	22.2006	21.0349	20.5846	11.9524		0.531736	0.308752
	VPLFIGSK	A	0.0289841	0.0603462	0.174134	0.296218					VPLFIGSK	A	6.04823	6.29634	9.08431	7.7266
		B	0.0293246		0.149181	0.145009						B	6.11928		7.78254	3.78244
		C	0.0276601	0.086441	0.138318	0.241014						C	5.77193	9.01899	7.21582	6.28667
		D										D
		E										E
		F										F					6.83029	1.54393	19.1725	0.176438	0.0398822	0.495258	298251	0.074635
HA11	IYSFNEGNYGLWDDSVK	A	0.0813372	0.171395	0.464206	0.820144				HA11	IYSFNEGNYGLWDDSVK	A	16.9729	17.8829	24.2169	21.3928
		B	0.079804	0.192609	0.356392	0.903314						B	16.653	20.0962	18.5924	23.5622
		C	0.0859877	0.320756	0.394996	0.987967						C	17.9434	33.4667	20.6063	25.7703
		D	0.186493	0.418224	1.07479	1.7109						D	77.8323	87.2724	112.14	89.2552
		E	0.208247	0.258654	1.15739	2.23563						E	86.9115	53.9742	120.758	116.629
		F	0.201957	0.347743	0.997393	1.75218						F	84.2861	72.5649	104.065	91.4083	56.4272	38.3183		1.50792	1.02399
	TLLYGGIYGYPGDAK	A	0.0710495	0.151715	0.374014	0.30533					TLLYGGIYGYPGDAK	A	14.8262	15.8295	19.5117	7.96429
		B	0.0720612	0.158499	0.319209	0.997372						B	15.0373	16.5373	16.6526	26.0157
		C	0.0650804	0.131553	0.322981	0.659859						C	13.5806	13.7258	16.8494	17.2119
		D	0.0292953	0.087396	0.184644	0.313729						D	12.2263	18.2373	19.2652	16.3667
		E	0.557005	0.0595606	0.748545	0.439257						E	232.465	12.4287	78.1008	22.9154
		F	0.0879447	0.0856373		0.398842						F	36.7035	17.8703		20.8069	29.6143	46.3141		0.791391	1.23767
	VPLFIGSK	A	0.028278	0.0654502	0.161421	0.300155					VPLFIGSK	A	5.90088	6.82887	8.42106	7.82931
		B	0.0326083	0.0750108	0.148235	0.323678						B	6.8045	7.8264	7.7332	8.44288
		C	0.0292301	0.0615032	0.138746	0.500838						C	6.09954	6.41706	7.23819	13.064
		D										D
		E										E
		F										F					7.71715	1.88517	17.9434	0.206228	0.050378	0.479506	288766	0.0698502
St1	IYSFNEGNYGLWDDSVK	A	0.0820543	0.199968	0.404465					St1	IYSFNEGNYGLWDDSVK	A	17.1226	20.8641	21.1003
		B	0.0831226	0.210947	0.415118	0.893195						B	17.3455	22.0096	21.6561	23.2983
		C	0.0797194	0.216746	0.400792	0.93844						C	16.6353	22.6146	20.9087	24.4785
		D	0.403944	0.579858	1.10996	2.11441						D	168.585	121.001	115.81	110.305
		E	0.337683	0.494203	1.44723	1.88519						E	140.931	103.127	150.999	98.3476
		F	0.26044	0.550117	1.07344	2.17372						F	108.694	114.795	112	113.399	73.3056	53.6008		2.25231	1.64688
	TLLYGGIYGYPGDAK	A	0.0408793	0.169957	0.343803						TLLYGGIYGYPGDAK	A	8.53043	17.7328	17.9357
		B	0.08263	0.182885	0.32267	0.585927						B	17.2427	19.0817	16.8332	15.2834
		C	0.0648285	0.150472	0.279057	0.883693						C	13.528	15.6998	14.558	23.0504
		D		0.094851	0.237159	0.415376						D		19.7929	24.7444	21.6695
		E	0.0579934	0.448119	0.474958	0.421261						E	24.2034	93.5107	49.5556	21.9765
		F	0.0488383	0.110671	0.210759	0.742908						F	20.3825	23.0941	21.9899	38.7563	24.5069	17.6255		0.752974	0.541544
	VPLFIGSK	A	0.029098	0.0675334	0.148806						VPLFIGSK	A	6.07199	7.04622	7.76298
		B	0.0290573	0.0808184	0.169816	0.323134						B	6.06349	8.43234	8.85902	8.42871
		C	0.0332797	0.075466	0.156016	0.261258						C	6.9446	7.87389	8.13909	6.81471
		D										D
		E										E
		F										F					7.49428	0.963457	21.0045	0.230261	0.0296022	0.645362	388646	0.0817666
St12	IYSFNEGNYGLWDDSVK	A	0.0867344	0.199062	0.511524	1.16242				St12	IYSFNEGNYGLWDDSVK	A	18.0992	20.7695	26.6854	30.3208
		B	0.0843453	0.250827	0.491219	1.10732						B	17.6007	26.1705	25.6261	28.8837
		C	0.0800099	0.167558	0.440187	0.740447						C	16.696	17.4825	22.9638	19.314
		D	0.228881	0.378158	1.03452	1.5986						D	95.5227	78.9117	107.938	83.3963
		E	0.231791	0.515972	1.18415	1.8579						E	96.7374	107.67	123.551	96.924
		F	0.261299	0.424966	1.03722	2.18435						F	109.053	88.6792	108.22	113.954	61.7154	41.1628		1.73247	1.15552
	TLLYGGIYGYPGDAK	A	0.0728975	0.16139	0.39743	0.950888					TLLYGGIYGYPGDAK	A	15.2118	16.839	20.7333	24.8032
		B	0.109811	0.173761	0.362684	0.589688						B	22.9146	18.1296	18.9206	15.3815
		C	0.0689482	0.141994	0.34506	0.513478						C	14.3877	14.8152	18.0013	13.3937
		D	0.0494827	0.107412	0.2181	0.37346						D	20.6515	22.414	22.7559	19.4828
		E	0.0509978	0.119471	0.265145	0.439717						E	21.2838	24.9304	27.6644	22.9393
		F	0.0576947	0.0884091	0.234451	0.395149						F	24.0787	18.4487	24.4619	20.6143	20.1357	3.86385		0.565248	0.108466
	VPLFIGSK	A	0.0265008	0.0702288	0.177001	0.287875					VPLFIGSK	A	5.53001	7.32745	9.23386	7.509
		B	0.0325692	0.0782395	0.188453	0.33154						B	6.79633	8.16326	9.83128	8.64796
		C	0.0308186	0.0757024	0.168638	0.280165						C	6.43102	7.89855	8.79756	7.30788
		D										D
		E										E
		F										F					7.78951	1.22923	20.6924	0.218667	0.0345068	0.580875	349811	0.0805516

## Sheet: TRK1
		Calvin-Cycle QconCAT
					ABC	14N Input			15N Input							DEF	15N Input
		pg protein/cell				Input: 10 µg Protein			47921.7	g/mol							47921.7	g/mol
			Mean	SD		≈cellnumber			0.1	0.05	0.025	0.0125	µg CBC-QconCAT				0.2	0.1	0.05	0.025	µg CBC-QconCAT
		UVM4	27.6487	1.73102		361680		≡ fmol	2086.74	1043.37	521.684	260.842				≡ fmol	4173.47	2086.74	1043.37	521.684
		HA5	25.8317	0.513853		387122
		HA11	26.7233	3.85716		374205
		St1	30.725	0.666054		325468
		St12	28.0719	2.62779		356228
			Ratio 14N native peptide / 15N Q-peptide										Ratio 14N/15N * amount of Q-prot added
		µg QP	0.1/0.2	0.05/0.1	0.025/0.05	0.0125/0.025			TRK1 [Da]	73947.3		µg QP	fmol/µg cell prot				Mean	SD	Median	amol/cell (from mean)	SD	amol/cell (from median)	molecules/cell (from median)	% of total proteins	Conc [µM] in chloroplast
UVM4	FLAIDAINK	A	0.397111	0.767934	1.79478	3.44529				UVM4	FLAIDAINK	A	82.8667	80.1238	93.6311	89.8678
		B	0.376223	0.915455	2.38954	4.3193						B	78.5078	95.5157	124.659	112.665
		C	0.378551	0.798285	2.23862	4.79577						C	78.9936	83.2906	116.785	125.094
		D	0.226729	0.592652	1.49154	2.91437						D	94.6246	123.671	155.623	152.038
		E	0.248825	0.536762	1.54954	2.9509						E	103.846	112.008	161.675	153.944
		F	0.257545	0.662789	1.50015							F	107.486	138.307	156.521		113.989	27.9571		3.15165	0.772979
	NPDFFNR	A	0.190825	0.365171	1.02393	1.93977					NPDFFNR	A	39.8201	38.1008	53.4167	50.5973
		B	0.179026	0.459829	1.29051	2.44353						B	37.3581	47.9771	67.3238	63.7375
		C	0.121054	0.281384	1.14178	2.39317						C	25.2608	29.3587	59.5649	62.424
		D	0.108068	0.313425								D	45.1019	65.4036
		E	0.120913		0.690138							E	50.4627		72.0068
		F	0.144475	0.298943	0.692629							F	60.2963	62.3815	72.2668		52.7821	14.0392		1.45936	0.388165
	VSTLIGYGSPNK	A	0.232246	0.463785	1.12796	1.83206					VSTLIGYGSPNK	A	48.4636	48.3899	58.8439	47.7878
		B	0.23144	0.564841	1.28833	1.97524						B	48.2954	58.9337	67.2101	51.5227
		C	0.236135	0.531321	1.30102	1.62133						C	49.2751	55.4363	67.8723	42.2911
		D	0.182141	0.416029	0.847332	1.7435						D	76.0161	86.8143	88.4079	90.9556
		E	0.162171	0.325355	0.831629	1.54155						E	67.6816	67.893	86.7696	80.4203
		F	0.165499	0.418042	0.887633	1.69473						F	69.0707	87.2344	92.6128	88.4117	67.7754	16.7219	72.1368	1.8739	0.462339	1.99449	1.20111e+06	0.533432	14.774
HA5	FLAIDAINK	A	0.391901	0.859003	2.21695	3.53762				HA5	FLAIDAINK	A	81.7794	89.6257	115.655	92.2761
		B	0.338882	0.728661	1.7739	3.53059						B	70.7158	76.0262	92.5418	92.0928
		C	0.383972	1.00425	1.67322	2.91125						C	80.1249	104.78	87.2891	75.9376
		D	0.219971	0.54712	1.51926							D	91.8043	114.17	158.515
		E	0.319678	0.539038	1.43075	2.83156						E	133.417	112.483	149.28	147.718
		F	0.214497	0.533944	1.45472	2.73543						F	89.5198	111.42	151.781	142.703	107.028	27.5781		2.76472	0.712388
	NPDFFNR	A	0.202545	0.398069	1.1299	2.18443					NPDFFNR	A	42.2658	41.5332	58.945	56.9792
		B	0.11382	0.368594	0.608311	1.95833						B	23.7513	38.4579	31.7346	51.0814
		C	0.18946	0.490685	0.944522	1.58266						C	39.5353	51.1965	49.2742	41.2826
		D	0.12978	0.278346	0.696449							D	54.1632	58.0835	72.6653
		E	0.155237	0.250562		0.842974						E	64.7879	52.2856		43.9766
		F	0.122692	0.264971								F	51.2053	55.2924			48.9249	11.3963		1.26381	0.294384
	VSTLIGYGSPNK	A	0.250663	0.469401	1.26789	1.8768					VSTLIGYGSPNK	A	52.3067	48.9758	66.1436	48.955
		B	0.226055	0.458641	1.19572	1.4176						B	47.1717	47.8531	62.3786	36.9769
		C	0.246103	0.599212	0.992017	1.60024						C	51.3552	62.5199	51.752	41.7411
		D	0.131025	0.315624	0.782022	1.41381						D	54.683	65.8624	81.5937	73.7562
		E	0.209237	0.302931	0.755997	1.62503						E	87.3247	63.2137	78.8783	84.7751
		F	0.125149	0.305839	0.741934	1.22036						F	52.2305	63.8205	77.4111	63.6641	61.056	13.9578	63.8205	1.57718	0.360554	1.64859	992804	0.471935
HA11	FLAIDAINK	A	0.405524	0.809561	2.09516	4.34636				HA11	FLAIDAINK	A	84.6221	84.467	109.301	113.371
		B	0.352412	0.718629	1.9764	4.40547						B	73.5391	74.9795	103.106	114.913
		C	0.359902	0.810849	2.05559	5.30475						C	75.1021	84.6014	107.237	138.37
		D	0.1973	0.480333	1.35433	2.65029						D	82.3425	100.233	141.307	138.261
		E	0.257775	0.328289	1.72712	3.45874						E	107.582	68.5053	180.202	180.437
		F	0.236598	0.553805	1.3892	2.67707						F	98.7436	115.564	144.945	139.658	110.891	31.696		2.96338	0.847023
	NPDFFNR	A	0.199101	0.419265	1.04393	2.18011					NPDFFNR	A	41.5472	43.7448	54.4603	56.8663
		B	0.180798	0.391081	0.977314	2.44039						B	37.7278	40.8042	50.9849	63.6556
		C	0.177412	0.388751	0.944126	1.86525						C	37.0212	40.561	49.2535	48.6535
		D	0.103378	0.239347								D	43.1447	49.9454
		E	0.148453	0.168637								E	61.9567	35.1901
		F	0.124556	0.273084	0.66329							F	51.9831	56.9855	69.2056		49.1417	9.65238		1.31323	0.257944
	VSTLIGYGSPNK	A	0.26551	0.537845	1.2325	1.95944					VSTLIGYGSPNK	A	55.405	56.1171	64.2978	51.1105
		B	0.260407	0.567387	1.14267	1.93997						B	54.3401	59.1994	59.6111	50.6026
		C	0.25203	0.49813	1.15345	2.37427						C	52.592	51.9733	60.1737	61.9309
		D	0.12158	0.289323	0.754921	1.32109						D	50.7411	60.3742	78.7661	68.9191
		E	0.153853	0.196223	0.797942	1.67471						E	64.2103	40.9465	83.2548	87.3668
		F	0.141761	0.336344	0.807349	1.37676						F	59.1636	70.1861	84.2362	71.8234	62.3892	11.9065	64.2103	1.66725	0.318182	1.71591	1.03335e+06	0.474817
St1	FLAIDAINK	A	0.3833	0.952154	1.74811					St1	FLAIDAINK	A	79.9846	99.3447	91.1961
		B	0.423454	0.954162	2.05777	3.86053						B	88.3638	99.5543	107.351	100.699
		C	0.361406	0.946643	1.80852	3.98871						C	75.416	98.7698	94.3477	104.042
		D	0.329684	0.627949	1.58704	3.47878						D	137.593	131.037	165.587	181.482
		E	0.328071		2.10091	2.59942						E	136.919		219.203	135.607
		F	0.257113	0.699685	1.49804							F	107.305	146.006	156.301		121.72	36.6837		3.73983	1.12711
	NPDFFNR	A		0.4389	0.954909						NPDFFNR	A		45.7934	49.8161
		B	0.220481	0.474874	1.01449	2.25577						B	46.0085	49.5469	52.9246	58.8399
		C	0.124533	0.468106	0.927451							C	25.9867	48.8408	48.3837
		D	0.196821									D	82.1427
		E	0.179235	0.330455								E	74.8032	68.9573
		F	0.137331	0.347623								F	57.3149	72.5397			55.8499	14.6533		1.71599	0.450221
	VSTLIGYGSPNK	A	0.238693	0.575227	1.03055						VSTLIGYGSPNK	A	49.809	60.0174	53.7624
		B	0.272784	0.634876	1.2304	2.16175						B	56.9228	66.241	64.1879	56.3875
		C	0.252324	0.615777	1.02842	1.94049						C	52.6534	64.2483	53.6513	50.6162
		D	0.189823	0.354001	0.906422	1.5475						D	79.2222	73.8707	94.5732	80.7306
		E	0.204817	0.359551	0.932458	1.34903						E	85.4798	75.0288	97.2898	70.3769
		F	0.150757	0.376112	0.778284	1.57447						F	62.9181	78.4846	81.2037	82.1374	69.1223	14.0749	76.9503	2.12378	0.432452	2.3643	1.42381e+06	0.569027
St12	FLAIDAINK	A	0.432041	0.887665	2.3223	5.70708				St12	FLAIDAINK	A	90.1555	92.6162	121.151	148.865
		B	0.384026	1.01451	2.00296	3.68556						B	80.136	105.851	104.491	96.1349
		C	0.391865	0.790244	2.11142	3.45094						C	81.7719	82.4516	110.149	90.015
		D	0.233677	0.569772	1.4733	2.91964						D	97.5245	118.896	153.719	152.313
		E	0.310993	0.699338	1.84993	2.91608						E	129.792	145.933	193.016	152.127
		F	0.246362	0.695318	1.494	2.85262						F	102.819	145.095	155.879	148.816	120.822	30.7781		3.39169	0.863999
	NPDFFNR	A	0.131274	0.409436	1.11635	2.2244					NPDFFNR	A	27.3935	42.7193	58.2381	58.0218
		B	0.107274	0.477272	1.18945	2.10263						B	22.3853	49.7971	62.052	54.8455
		C	0.170509	0.380307	0.932889							C	35.5807	39.68	48.6674
		D	0.123373	0.261724		1.39246						D	51.4894	54.615		72.6424
		E	0.19172	0.345683								E	80.014	72.135
		F	0.141016	0.306993								F	58.8528	64.0613			52.955	15.3196		1.48655	0.43005
	VSTLIGYGSPNK	A	0.288141	0.615775	1.39524	2.24557					VSTLIGYGSPNK	A	60.1275	64.248	72.7873	58.574
		B	0.26077	0.67543	1.28908	1.91766						B	54.4158	70.4723	67.2493	50.0207
		C	0.267793	0.5256	1.19184	1.77999						C	55.8814	54.8394	62.1766	46.4298
		D	0.15169	0.36288	0.833956	1.39021						D	63.3076	75.7236	87.0123	72.5252
		E	0.181181	0.405319	0.854228	1.49252						E	75.6155	84.5794	89.1275	77.8625
		F	0.151479	0.44312	0.816949	1.4689						F	63.2196	92.4675	85.2379	76.6304	69.1888	12.889	75.6695	1.94226	0.361818	2.12419	1.27922e+06	0.559556

## Sheet: RPE1
		Calvin-Cycle QconCAT
					ABC	14N Input			15N Input							DEF	15N Input
		pg protein/cell				Input: 10 µg Protein			47921.7	g/mol							47921.7	g/mol
			Mean	SD		≈cellnumber			0.1	0.05	0.025	0.0125	µg CBC-QconCAT				0.2	0.1	0.05	0.025	µg CBC-QconCAT
		UVM4	27.6487	1.73102		361680		≡ fmol	2086.74	1043.37	521.684	260.842				≡ fmol	4173.47	2086.74	1043.37	521.684
		HA5	25.8317	0.513853		387122
		HA11	26.7233	3.85716		374205
		St1	30.725	0.666054		325468
		St12	28.0719	2.62779		356228
			Ratio 14N native peptide / 15N Q-peptide										Ratio 14N/15N * amount of Q-prot added
		µg QP	0.1/0.2	0.05/0.1	0.025/0.05	0.0125/0.025			RPE1 [Da]	26071.2		µg QP	fmol/µg cell prot				Mean	SD	Median	amol/cell (from mean)	SD	amol/cell (from median)	molecules/cell (from median)	% of total proteins	Conc [µM] in chloroplast
UVM4	FIESQVAK	A	0.0536219	0.108197						UVM4	FIESQVAK	A	11.1895	11.2889
		B		0.137602	0.332261	0.618643						B		14.357	17.3335	16.1368
		C	0.0515805	0.111323	0.282384							C	10.7635	11.615	14.7315
		D										D
		E										E
		F										F					13.427	2.53901		0.371239	0.0702003
	GVNPWIEVDGGVTPENAYK	A	0.125419	0.307529	0.690584	0.70096					GVNPWIEVDGGVTPENAYK	A	26.1717	32.0866	36.0267	18.284
		B	0.175092	0.346922								B	36.5371	36.1968
		C	0.154811	0.23478	0.71044							C	32.3049	24.4962	37.0626
		D	0.175613	0.249176	0.517308	1.01423						D	73.2917	51.9965	53.9743	52.911
		E	0.119957	0.240644	0.446453	0.999953						E	50.0638	50.216	46.5815	52.166
		F	0.132874	0.184721	0.370911	0.590929						F	55.4547	38.5465	38.6996	30.8278	41.6141	12.9598		1.15058	0.358323
	SDIIVSPSILSADFSR	A	0.12196	0.0741137	0.0189408	0.18707					SDIIVSPSILSADFSR	A	25.4499	7.73279	0.988114	4.87957
		B	0.0150704	0.0387149	0.0872674	0.23303						B	3.1448	4.03939	4.5526	6.07841
		C	0.248643	0.377324	0.104917	0.210152						C	51.8852	39.3688	5.47334	5.48165
		D	0.00944397	0.020655	0.0485895	0.0609455						D	3.94142	4.31015	5.06967	3.17943
		E	0.00837042	0.0160067	0.0425511	0.0921975						E	3.49337	3.34017	4.43965	4.8098
		F	0.00790882	0.0182431								F	3.30073	3.80685			9.03481	12.8801	16.1368	0.249801	0.356119	0.446162	268685	0.0420706	3.30491
HA5	FIESQVAK	A		0.110226						HA5	FIESQVAK	A		11.5006
		B	0.0493306									B	10.294
		C		0.137499	0.254532	0.367474						C		14.3462	13.2785	9.58526
		D										D
		E										E
		F										F					11.8009	1.99574		0.304837	0.0515532
	GVNPWIEVDGGVTPENAYK	A	0.107133	0.749956	0.613345	0.612893					GVNPWIEVDGGVTPENAYK	A	22.3559	78.248	31.9972	15.9868
		B	0.0758726	0.260093		0.685302						B	15.8326	27.1373		17.8756
		C	0.0957925	0.285104	0.528961	0.913317						C	19.9894	29.7469	27.595	23.8232
		D	0.144374	0.200026	0.443177	0.827343						D	60.2541	41.7402	46.2397	43.1612
		E	0.116271	0.211507	0.386769	1.02383						E	48.5253	44.1359	40.3542	53.4117
		F	0.141994	0.18507	0.375801	0.770558						F	59.2609	38.6193	39.2099	40.1988	37.6391	15.8865		0.972281	0.410374
	SDIIVSPSILSADFSR	A	0.0180336	0.0336065	0.0976196	0.205017					SDIIVSPSILSADFSR	A	3.76313	3.5064	5.09266	5.34772
		B		0.0277494	0.0952402	0.15572						B		2.89528	4.96853	4.06184
		C	0.0162629	0.0472933	0.076984	0.140546						C	3.39364	4.93444	4.01613	3.66604
		D	0.00786703	0.0134258	0.0408966							D	3.28329	2.80161	4.26702
		E	0.0094361	0.0152533	0.0395345	0.0802244						E	3.93813	3.18297	4.1249	4.18518
		F	0.00818097	0.0170875	0.0377022	0.0628134						F	3.41431	3.56572	3.93373	3.27688	3.8918	0.70267	12.3896	0.100532	0.0181511	0.320043	192735	0.0323011
HA11	FIESQVAK	A	0.0507642		0.20615	0.486365				HA11	FIESQVAK	A	10.5931		10.7545	12.6865
		B		0.122581								B		12.7897
		C	0.0489899		0.243501							C	10.2229		12.7031
		D										D
		E										E
		F										F					11.625	1.21933		0.310658	0.0325846
	GVNPWIEVDGGVTPENAYK	A	0.122702	0.298614	0.524166						GVNPWIEVDGGVTPENAYK	A	25.6048	31.1565	27.3449
		B	0.116031	0.276093	0.502286							B	24.2126	28.8066	26.2035
		C	0.13476	0.191513	0.28692							C	28.121	19.9818	14.9682
		D	0.136912	0.196869	0.453578	0.777751						D	57.1398	41.0814	47.3249	40.5741
		E	0.133893	0.106198	0.375083	1.05757						E	55.8799	22.1608	39.1349	55.1716
		F	0.124886	0.121306	0.412948	0.607394						F	52.121	25.3134	43.0857	31.6868	35.0988	12.7787		0.937956	0.341491
	SDIIVSPSILSADFSR	A	0.0179419		0.0807517	0.0570018					SDIIVSPSILSADFSR	A	3.74399		4.21269	1.48685
		B	0.0152087	0.0277758	0.0878319	0.183522						B	3.17366	2.89804	4.58205	4.78702
		C	0.0162884	0.0308003	0.0733583	0.201233						C	3.39896	3.21361	3.82699	5.249
		D	0.00813225	0.0127239	0.0316369	0.0548994						D	3.39397	2.65513	3.30089	2.86402
		E	0.00741858	0.00881941	0.0431029							E	3.09613	1.84038	4.49722
		F	0.00615287	0.0152045	0.0302034	0.0656889						F	2.56788	3.17278	3.15133	3.42689	3.38816	0.901935	10.7545	0.0905429	0.0241027	0.287396	173074	0.0280383
St1	FIESQVAK	A	0.0533774	0.124372						St1	FIESQVAK	A	11.1385	12.9766
		B		0.115057								B		12.0047
		C	0.0560681	0.154621	0.261617	0.602598						C	11.6999	16.1327	13.6482	15.7183
		D										D
		E										E
		F										F					13.3313	1.95796		0.409603	0.0601583
	GVNPWIEVDGGVTPENAYK	A	0.102558	0.2624	0.631378						GVNPWIEVDGGVTPENAYK	A	21.4011	27.378	32.938
		B	0.0983191	0.221237	0.4639							B	20.5166	23.0831	24.2009
		C	0.108781	0.355718	0.384092	0.779482						C	22.6998	37.1145	20.0375	20.3322
		D	0.188777	0.283964	0.496882	0.980445						D	78.7858	59.2558	51.8431	51.1483
		E	0.192053	0.232375	0.531827	0.899304						E	80.1527	48.4906	55.4891	46.9153
		F	0.124919	0.21487	0.393187	0.837035						F	52.1345	44.8378	41.0239	43.6668	41.0657	18.0414		1.26174	0.554321
	SDIIVSPSILSADFSR	A	0.0161023		0.0883339						SDIIVSPSILSADFSR	A	3.36013		4.60824
		B	0.0301395			0.164629						B	6.28932			4.29422
		C	0.170714	0.0308222	0.0778162	0.171309						C	35.6235	3.2159	4.05955	4.46847
		D	0.00985904	0.0197421	0.049814	0.0710364						D	4.11465	4.11966	5.19743	3.70586
		E	0.00847108	0.0171618								E	3.53539	3.58122
		F	0.00558502	0.0230541	0.0347612							F	2.33089	4.81078	3.62687		5.93777	7.70016	18.0851	0.182438	0.236587	0.555664	334629	0.04715
St12	FIESQVAK	A	0.0559052	0.120472	0.328765	0.691061				St12	FIESQVAK	A	11.6659	12.5696	17.1512	18.0258
		B	0.0511256									B	10.6686
		C	0.0620935	0.10065		0.456286						C	12.9573	10.5015		11.9019
		D										D
		E										E
		F										F					13.1802	2.85561		0.369994	0.0801624
	GVNPWIEVDGGVTPENAYK	A	0.0989176	0.197623	0.482387	0.562438					GVNPWIEVDGGVTPENAYK	A	20.6415	20.6194	25.1654	14.6707
		B	0.0952616	0.230723	0.43787	1.18201						B	19.8786	24.0729	22.843	30.8319
		C	0.104971	0.177536	0.361676	0.598053						C	21.9046	18.5236	18.8681	15.5997
		D	0.117643	0.191723	0.491166	0.734636						D	49.0982	40.0075	51.2468	38.3248
		E	0.0981216	0.250228	0.386084	0.747243						E	40.9508	52.216	40.2828	38.9825
		F	0.129559	0.172923	0.372642	0.62532						F	54.0713	36.0845	38.8803	32.6219	31.9328	12.4237		0.896415	0.348756
	SDIIVSPSILSADFSR	A	0.0171078	0.293529	0.446833	0.205244					SDIIVSPSILSADFSR	A	3.56995	30.6259	23.3106	5.35364
		B		0.0436528	0.0959419	0.210712						B		4.55459	5.00514	5.49626
		C	0.0172978	0.0333391	0.0586135	0.174371						C	3.60959	3.4785	3.05777	4.54834
		D	0.00869246	0.0175653	0.03664	0.0582406						D	3.62778	3.66542	3.82291	3.03832
		E	0.0105887	0.0170531	0.0396287	0.062646						E	4.41915	3.55854	4.13473	3.26814
		F	0.00944405	0.01559	0.0416132	0.0648803						F	3.94145	3.25323	4.34179	3.3847	5.95941	6.75516	14.6707	0.167292	0.18963	0.411836	248013	0.0382484

## Sheet: PRK1
		Calvin-Cycle QconCAT
					ABC	14N Input			15N Input							DEF	15N Input
		pg protein/cell				Input: 10 µg Protein			47921.7	g/mol							47921.7	g/mol
			Mean	SD		≈cellnumber			0.1	0.05	0.025	0.0125	µg CBC-QconCAT				0.2	0.1	0.05	0.025	µg CBC-QconCAT
		UVM4	27.6487	1.73102		361680		≡ fmol	2086.74	1043.37	521.684	260.842				≡ fmol	4173.47	2086.74	1043.37	521.684
		HA5	25.8317	0.513853		387122
		HA11	26.7233	3.85716		374205
		St1	30.725	0.666054		325468
		St12	28.0719	2.62779		356228
			Ratio 14N native peptide / 15N Q-peptide										Ratio 14N/15N * amount of Q-prot added
		µg QP	0.1/0.2	0.05/0.1	0.025/0.05	0.0125/0.025			PRK1 [Da]	38567.3		µg QP	fmol/µg cell prot				Mean	SD	Median	amol/cell (from mean)	SD	amol/cell (from median)	molecules/cell (from median)	% of total proteins	Conc [µM] in chloroplast
UVM4	GHSLESIK	A	0.700463	1.57411	3.59425	5.16338				UVM4	GHSLESIK	A	146.168	164.237	187.506	134.683
		B	0.759405	1.9919	3.84589	8.05531						B	158.468	207.829	200.634	210.116
		C	0.614526	1.55489	3.89952	6.77393						C	128.235	162.233	203.432	176.693
		D	0.169213	0.370856		1.73162						D	70.6205	77.388		90.3359
		E	0.195566									E	81.6189
		F	0.177288	0.373371								F	73.9907	77.9127			141.783	51.5702		3.92013	1.42585
	IYLDISDDIK	A	0.191958	0.445487	1.10637	2.21917					IYLDISDDIK	A	40.0566	46.4807	57.7174	57.8853
		B	0.231337	0.511037	1.33209	2.45695						B	48.2739	53.32	69.493	64.0875
		C	0.231698	0.501438	1.25378	2.22785						C	48.3492	52.3185	65.4075	58.1118
		D	0.128764	0.252483	0.687637	1.36082						D	53.7393	52.6865	71.7459	70.9921
		E	0.124829	0.261097	0.72904	1.34042						E	52.0971	54.484	76.0658	69.9278
		F	0.126374	0.286154	0.719488	1.39027						F	52.7418	59.7128	75.0691	72.5284	59.3038	10.0713		1.63968	0.278457
	VAELLDFK	A	0.2264	0.40921	1.18339	2.03401					VAELLDFK	A	47.2437	42.6957	61.7356	53.0556
		B	0.255615	0.567221	1.21294	2.14875						B	53.3402	59.1821	63.2772	56.0484
		C	0.220951	0.503423	1.23279	1.77938						C	46.1067	52.5256	64.3129	46.4138
		D	0.0235471	0.0576924	0.128756	0.263181						D	9.82734	12.0389	13.434	13.7297
		E	0.0261885	0.0554746	0.145043	0.302136						E	10.9297	11.5761	15.1333	15.762
		F	0.0286875	0.0573582	0.111099	0.264283						F	11.9727	11.9691	11.5917	13.7872	53.8281	7.25977	64.2002	1.48828	0.200723	1.77505	1.06896e+06	0.247603	13.1485
HA5	GHSLESIK	A	0.365476	0.842545	2.34272	3.61263				HA5	GHSLESIK	A	76.2652	87.9086	122.216	94.2327
		B	0.25109	0.851764	2.27305	3.09461						B	52.396	88.8704	118.581	80.7204
		C	0.329908	0.991029	1.68257	2.79732						C	68.8431	103.401	87.7772	72.966
		D		0.312935	0.738407							D		65.3013	77.043
		E	0.183918	0.325242	0.729743							E	76.7579	67.8695	76.1391
		F		0.279767		1.3976						F		58.3799		72.9107	81.5042	18.3258		2.10539	0.473387
	IYLDISDDIK	A	0.207237	0.453005	1.13701	2.19898					IYLDISDDIK	A	43.2449	47.2652	59.3161	57.3586
		B	0.186064	0.424901	1.08205	1.73102						B	38.8267	44.3329	56.449	45.1524
		C	0.222987	0.516455	0.922179	1.54281						C	46.5315	53.8853	48.1086	40.2429
		D	0.105975	0.247674	0.643474	1.18612						D	44.2283	51.6831	67.1381	61.8782
		E	0.116051	0.229805	0.614388	1.1288						E	48.4336	47.9542	64.1034	58.8876
		F	0.111839	0.231793	0.610195	1.10687						F	46.6758	48.3691	63.6659	57.7439	51.7281	8.03861		1.33622	0.207651
	VAELLDFK	A	0.195364	0.344977	0.992024	1.83219					VAELLDFK	A	40.7673	35.9938	51.7523	47.7913
		B	0.146876	0.321621	0.876534							B	30.6491	33.557	45.7274
		C	0.139748	0.44426	0.70359	1.59758						C	29.1617	46.3527	36.7052	41.6717
		D	0.0235221	0.0494731	0.124641	0.200675						D	9.81687	10.3237	13.0047	10.4689
		E	0.0376584	0.0531528	0.118936	0.175888						E	15.7166	11.0916	12.4094	9.17579
		F	0.0231287	0.0425044	0.118557	0.217761						F	9.65271	8.86954	12.3699	11.3603	40.0118	7.40735	55.1672	1.03357	0.191344	1.42506	858191	0.212765
HA11	GHSLESIK	A	0.299348	0.717573	1.59409	3.53261				HA11	GHSLESIK	A	62.466	74.8693	83.161	92.1453
		B	0.271331	0.705396	1.70844	4.20448						B	56.6198	73.5988	89.1264	109.671
		C	0.271451	0.677405	1.77358	3.90201						C	56.6448	70.6783	92.525	101.781
		D	0.128498									D	53.6282
		E			0.868153							E			90.5803
		F	0.15606	0.311337	0.782604	1.38081						F	65.1311	64.9679	81.6544	72.0345	77.2935	16.2607		2.06554	0.434539
	IYLDISDDIK	A	0.209558	0.41349	0.941646	1.92936					IYLDISDDIK	A	43.7293	43.1422	49.1242	50.3258
		B	0.191195	0.416463	0.930773	1.94988						B	39.8973	43.4525	48.557	50.8612
		C	0.205997	0.419019	0.994004	2.39485						C	42.9862	43.7192	51.8556	62.4678
		D	0.103656	0.230891	0.615672	1.30765						D	43.2606	48.1808	64.2373	68.2182
		E	0.137071	0.157417	0.699078	1.29428						E	57.2062	32.8488	72.9396	67.5207
		F	0.119323	0.247895	0.646488	1.12411						F	49.7992	51.7292	67.4526	58.643	52.1731	10.4551		1.39424	0.279396
	VAELLDFK	A	0.15154	0.364232	0.779472	1.29403					VAELLDFK	A	31.6225	38.0028	40.6638	33.7539
		B	0.153642	0.345429	0.761274	1.75844						B	32.061	36.041	39.7145	45.8676
		C	0.15108	0.281737	0.721498							C	31.5264	29.3956	37.6394
		D	0.0205917	0.0379738	0.0980983	0.179106						D	8.5939	7.92414	10.2353	9.34369
		E	0.0282607	0.0278552	0.124317	0.292571						E	11.7945	5.81265	12.9708	15.2629
		F	0.0261061	0.0477355	0.118737	0.199219						F	10.8953	9.96115	12.3886	10.3929	36.0262	4.92916	51.8556	0.962741	0.131723	1.38575	834521	0.199993
St1	GHSLESIK	A	0.261208	0.727956	1.67662					St1	GHSLESIK	A	54.5072	75.9527	87.4665
		B	0.252925	0.73694	1.60382	3.49779						B	52.7788	76.89	83.6689	91.2371
		C	0.197039	0.658121	1.35054	3.57036						C	41.1168	68.6662	70.4557	93.13
		D			0.981761	1.86954						D			102.434	97.5308
		E		0.337824		1.94159						E		70.4949		101.29
		F										F					77.8413	18.5175		2.39167	0.568949
	IYLDISDDIK	A	0.202594	0.494206	0.979041						IYLDISDDIK	A	42.276	51.5639	51.0751
		B	0.221496	0.515801	1.11371	2.0407						B	46.2203	53.817	58.1004	53.2302
		C	0.190522	0.449811	0.985989	2.15362						C	39.7569	46.9319	51.4375	56.1755
		D	0.132751	0.279249	0.725757							D	55.4033	58.2718	75.7232
		E	0.133547	0.28822	0.732917	1.5048						E	55.7353	60.1439	76.4703	78.5031
		F	0.115356	0.270447	0.657636							F	48.1435	56.4352	68.6157		56.3824	10.6463		1.73235	0.327107
	VAELLDFK	A	0.141001	0.339717	0.64698						VAELLDFK	A	29.4233	35.445	33.7519
		B	0.132903	0.369212	0.85528	1.65691						B	27.7334	38.5224	44.6186	43.2192
		C	0.132556	0.367231	0.636807	1.38747						C	27.661	38.3157	33.2212	36.1912
		D	0.0393589	0.0579959	0.130325	0.298265						D	16.4263	12.1022	13.5977	15.56
		E	0.0401397	0.060003	0.366083	0.343549						E	16.7522	12.5211	38.1959	17.9224
		F	0.0314142	0.0686221	0.130917							F	13.1107	14.3196	13.6594		35.2821	5.71578	54.5072	1.08404	0.175617	1.67473	1.00855e+06	0.21022
St12	GHSLESIK	A	0.28518	0.651488	1.90538	3.41116				St12	GHSLESIK	A	59.5095	67.9742	99.4006	88.9774
		B	0.276564	0.662476	1.70912	3.35564						B	57.7116	69.1207	89.1623	87.5293
		C	0.245955	0.47292	1.43765	2.4078						C	51.3244	49.343	74.9998	62.8057
		D	0.178376									D	74.4449
		E	0.220679	0.399896	0.944086							E	92.0998	83.4477	98.503
		F			0.84858	1.46597						F			88.5382	76.4772	76.1872	15.7465		2.13872	0.442033
	IYLDISDDIK	A	0.210576	0.470681	1.22941	2.39179					IYLDISDDIK	A	43.9417	49.1093	64.1365	62.3881
		B	0.206414	0.524188	1.29437	2.28435						B	43.0731	54.6921	67.5255	59.5854
		C	0.192407	0.398154	0.99285	1.9484						C	40.1503	41.5421	51.7954	50.8226
		D	0.124806	0.282971	0.697597	1.25855						D	52.0877	59.0486	72.7851	65.6566
		E	0.134084	0.26789	0.674693	1.2636						E	55.9596	55.9017	70.3953	65.9202
		F	0.123417	0.249652	0.666214	1.27233						F	51.5076	52.0957	69.5107	66.3755	56.9169	9.6229		1.59777	0.270133
	VAELLDFK	A	0.130774	0.231629	0.733539	1.14116					VAELLDFK	A	27.2892	24.1675	38.2676	29.7663
		B	0.131631	0.320861	0.776352	1.5283						B	27.4678	33.4777	40.5011	39.8645
		C	0.109927	0.280649	0.6659	1.46871						C	22.939	29.282	34.739	38.3103
		D	0.0338412	0.0605296	0.125632	0.236471						D	14.1235	12.6309	13.1081	12.3363
		E	0.0431219	0.0727034	0.227594	0.292189						E	17.9968	15.1713	23.7464	15.243
		F	0.0308227	0.0700134	0.128223	0.257358						F	12.8638	14.61	13.3784	13.426	32.1727	6.1873	56.8356	0.903148	0.173689	1.59548	960823	0.2192

## Sheet: RPI1
		Calvin-Cycle QconCAT
					ABC	14N Input			15N Input							DEF	15N Input
		pg protein/cell				Input: 10 µg Protein			47921.7	g/mol							47921.7	g/mol
			Mean	SD		≈cellnumber			0.1	0.05	0.025	0.0125	µg CBC-QconCAT				0.2	0.1	0.05	0.025	µg CBC-QconCAT
		UVM4	27.6487	1.73102		361680		≡ fmol	2086.74	1043.37	521.684	260.842				≡ fmol	4173.47	2086.74	1043.37	521.684
		HA5	25.8317	0.513853		387122
		HA11	26.7233	3.85716		374205
		St1	30.725	0.666054		325468
		St12	28.0719	2.62779		356228
			Ratio 14N native peptide / 15N Q-peptide										Ratio 14N/15N * amount of Q-prot added
		µg QP	0.1/0.2	0.05/0.1	0.025/0.05	0.0125/0.025			RPI1 [Da]	26365.5		µg QP	fmol/µg cell prot				Mean	SD	Median	amol/cell (from mean)	SD	amol/cell (from median)	molecules/cell (from median)	% of total proteins	Conc [µM] in chloroplast
UVM4	LANLPEVK	A	0.0421904	0.0819507	0.173069	0.259369				UVM4	LANLPEVK	A	8.80404	8.55048	9.02876	6.76544
		B	0.0330548	0.0925442	0.257702	0.414782						B	6.89768	9.65577	13.4439	10.8193
		C	0.0443794	0.103032	0.256559	0.407074						C	9.26082	10.7501	13.3843	10.6182
		D			0.180181	0.330022						D			18.7995	17.2167
		E			0.178141	0.351101						E			18.5866	18.3164
		F	0.0340178	0.0803171	0.177262	0.344171						F	14.1973	16.7601	18.4949	17.9549	12.9153	4.30022		0.35709	0.118896
	LQNIVGVPTSIR	A	0.0332285	0.0738896	0.144723	0.269109					LQNIVGVPTSIR	A	6.93391	7.70941	7.54999	7.01951
		B	0.0354973	0.0848617	0.24387	0.473215						B	7.40736	8.8542	12.7223	12.3434
		C	0.0371725	0.0932418	0.231676	0.473067						C	7.75692	9.72856	12.0862	12.3396
		D	0.0309118	0.067168	0.182032	0.280771						D	12.901	14.0162	18.9927	14.6474
		E	0.0243943	0.059153	0.212726	0.348244						E	10.1809	12.3437	22.1952	18.1673
		F	0.0333449	0.0975482	0.185682	0.345149						F	13.9164	20.3558	19.3735	18.0059	12.8145	4.65223		0.354304	0.128628
	TQLSQDELK	A	0.00965597	0.0146872	0.0456831	0.147455					TQLSQDELK	A	2.01495	1.53242	2.38322	3.84625
		B	0.00558922	0.0193172	0.158236	0.13726						B	1.16632	2.0155	8.2549	3.58032
		C		0.0184238	0.0473582							C		1.92228	2.47061
		D	0.0171564	0.0366712	0.073458	0.166106						D	7.16018	7.65231	7.66438	8.66549
		E	0.0168051	0.0322963	0.0876905							E	7.01355	6.7394	9.14935
		F	0.0162955	0.036365	0.0820716	0.182211						F	6.80088	7.58842	8.5631	9.50567	5.50902	2.95998	12.3436	0.152318	0.0818396	0.341284	205526	0.0325444	2.52803
HA5	LANLPEVK	A	0.0519861	0.103365		0.403686				HA5	LANLPEVK	A	10.8481	10.7848		10.5298
		B	0.047063	0.101645	0.255763							B	9.82081	10.6053	13.3428
		C	0.0564246	0.128459	0.232762	0.319726						C	11.7743	13.403	12.1428	8.3398
		D			0.168997							D			17.6326
		E	0.0357969		0.177209							E	14.9397		18.4895
		F		0.0636303	0.167546	0.287948						F		13.278	17.4812	15.0218	13.0271	3.00342		0.336513	0.0775834
	LQNIVGVPTSIR	A	0.0442967	0.089558	0.253129	0.544998					LQNIVGVPTSIR	A	9.24356	9.3442	13.2053	14.2158
		B	0.0392383	0.0867429	0.241511	0.410151						B	8.18799	9.05048	12.5992	10.6985
		C	0.0459134	0.120568	0.208111	0.316721						C	9.58092	12.5796	10.8568	8.26142
		D	0.026729	0.0598619	0.166274	0.323118						D	11.1553	12.4916	17.3485	16.8566
		E	0.0335707	0.056006	0.146121	0.354411						E	14.0107	11.687	15.2458	18.489
		F	0.0286977	0.0599524	0.133108	0.349876						F	11.9769	12.5105	13.8881	18.2525	12.5724	3.04145		0.324765	0.0785657
	TQLSQDELK	A	0.00487617	0.0152696	0.0504002						TQLSQDELK	A	1.01753	1.59318	2.6293
		B	0.00576227	0.0175445		0.0681585						B	1.20244	1.83054		1.77786
		C			0.0679181	0.174912						C			3.54318	4.56243
		D	0.0140495	0.0353952	0.102346	0.178318						D	5.8635	7.38604	10.6784	9.30255
		E	0.0221214	0.0433685		0.220855						E	9.23231	9.04988		11.5217
		F	0.0172774	0.033856	0.109124							F	7.21069	7.06486	11.3857		5.93623	3.74513	12.501	0.153343	0.0967429	0.322923	194469	0.0329596
HA11	LANLPEVK	A	0.0495023	0.109719	0.228127	0.417431				HA11	LANLPEVK	A	10.3298	11.4478	11.901	10.8884
		B	0.0453618	0.108366	0.206158	0.376857						B	9.46582	11.3066	10.7549	9.83002
		C	0.0483811	0.103994	0.238068	0.477135						C	10.0959	10.8504	12.4196	12.4457
		D		0.0682075	0.157409	0.294876						D		14.2331	16.4235	15.3832
		E	0.034233		0.165575	0.327093						E	14.287		17.2755	17.0639
		F	0.0310547	0.0649826	0.172302	0.303654						F	12.9606	13.5602	17.9774	15.8412	13.0337	2.6535		0.348304	0.0709104
	LQNIVGVPTSIR	A	0.044573	0.0915686	0.218517	0.469163					LQNIVGVPTSIR	A	9.30122	9.55398	11.3997	12.2377
		B	0.0428705	0.0953241	0.215933	0.506999						B	8.94595	9.94581	11.2649	13.2247
		C	0.0426957	0.0913736	0.240618	0.549036						C	8.90948	9.53364	12.5527	14.3212
		D	0.0244754	0.057714	0.154303	0.372998						D	10.2148	12.0434	16.0995	19.4587
		E	0.0292196	0.0387434	0.174055	0.316106						E	12.1947	8.08474	18.1604	16.4907
		F	0.0278231	0.062054	0.157367	0.338726						F	11.6119	12.949	16.4192	17.6708	12.6079	3.25429		0.336924	0.0869655
	TQLSQDELK	A		0.0255471	0.0644515	0.10189					TQLSQDELK	A		2.6655	3.36233	2.65772
		B										B
		C										C
		D	0.0143852	0.0296772	0.0946509	0.157707						D	6.00364	6.19286	9.87558	8.22734
		E	0.0159977	0.0216803	0.0996653							E	6.67659	4.52411	10.3988
		F	0.0135663	0.0397607	0.0852402	0.224672						F	5.66188	8.29701	8.89369	11.7208	6.79699	2.89362	12.2162	0.181638	0.0773272	0.326458	196598	0.0322086
St1	LANLPEVK	A	0.0416832	0.110572	0.214915					St1	LANLPEVK	A	8.6982	11.5367	11.2118
		B	0.0498248	0.11365	0.258771	0.420601						B	10.3971	11.8579	13.4997	10.971
		C	0.0441031	0.102424	0.212484	0.417842						C	9.20316	10.6866	11.0849	10.8991
		D		0.0727748		0.334738						D		15.1862		17.4628
		E				0.330824						E				17.2586
		F		0.0751057								F		15.6726			12.3751	2.78074		0.380224	0.0854382
	LQNIVGVPTSIR	A	0.0357903	0.105268	0.230891						LQNIVGVPTSIR	A	7.4685	10.9833	12.0452
		B	0.0453868	0.100884	0.23131	0.470417						B	9.47102	10.5259	12.0671	12.2705
		C	0.0381214	0.0997558	0.213409	0.503822						C	7.95493	10.4082	11.1332	13.1418
		D	0.0336588	0.069666	0.184833	0.343861						D	14.0474	14.5375	19.2849	17.9387
		E	0.0354275	0.0629598	0.19203	0.322008						E	14.7856	13.1381	20.0358	16.7986
		F	0.0300769	0.0627369	0.160589							F	12.5525	13.0915	16.7554		13.2016	3.37453		0.405619	0.103682
	TQLSQDELK	A	0.0130996	0.049988	0.20012						TQLSQDELK	A	2.73355	5.21559	10.44
		B	0.0109727	0.0263409	0.110366	0.21632						B	2.28972	2.74833	5.75762	5.64255
		C	0.00667694	0.0253979	0.0539163	0.100732						C	1.3933	2.64993	2.81273	2.62751
		D	0.0176362	0.0331909	0.101703	0.174606						D	7.36043	6.92606	10.6114	9.10891
		E	0.0243201	0.0403817	0.0984727	0.181084						E	10.1499	8.42661	10.2743	9.44689
		F	0.0161302	0.0377716	0.0883286							F	6.73191	7.88194	9.21593		6.38387	3.144	12.0671	0.196144	0.0965993	0.370761	223277	0.0318154
St12	LANLPEVK	A	0.0533079	0.116492	0.294714	0.455145				St12	LANLPEVK	A	11.1239	12.1544	15.3748	11.8721
		B	0.0512138	0.11429	0.178018	0.427727						B	10.687	11.9246	9.28694	11.1569
		C	0.0475808	0.0944082	0.233825	0.404623						C	9.92886	9.85026	12.1983	10.5543
		D		0.069967	0.180307	0.300974						D		14.6003	18.8127	15.7013
		E				0.321119						E				16.7523
		F	0.0366682			0.315106						F	15.3034			16.4386	12.9845	2.82492		0.3645	0.0793011
	LQNIVGVPTSIR	A	0.045604	0.100655	0.295158	0.607419					LQNIVGVPTSIR	A	9.51636	10.502	15.3979	15.8441
		B	0.0458294	0.106477	0.28984	0.539737						B	9.5634	11.1094	15.1205	14.0786
		C	0.0399878	0.0896166	0.240218	0.494997						C	8.34441	9.35032	12.5318	12.9116
		D	0.0272674	0.0680974	0.175446	0.310451						D	11.38	14.2101	18.3054	16.1957
		E	0.0349534	0.0762217	0.170524	0.325272						E	14.5877	15.9055	17.792	16.9689
		F	0.0310662	0.0609599	0.155625	0.321845						F	12.9654	12.7207	16.2374	16.7901	13.6804	2.90743		0.384035	0.0816172
	TQLSQDELK	A		0.0181447		0.0476928					TQLSQDELK	A		1.89316		1.24403
		B	0.00798463	0.0180097		0.0820052						B	1.66618	1.87908		2.13904
		C	0.0105965			0.0605602						C	2.2112			1.57967
		D	0.0123811	0.0327065	0.0827962	0.169102						D	5.16723	6.82499	8.63869	8.82177
		E	0.011163	0.0255273		0.184393						E	4.65883	5.32687		9.61948
		F	0.0155796	0.0293256	0.0768488	0.128192						F	6.50211	6.11948	8.01816	6.68758	4.94431	2.87437	12.9385	0.138796	0.080689	0.363209	218729	0.034113

## Sheet: TPI1
		Calvin-Cycle QconCAT
					ABC	14N Input			15N Input							DEF	15N Input
		pg protein/cell				Input: 10 µg Protein			47921.7	g/mol							47921.7	g/mol
			Mean	SD		≈cellnumber			0.1	0.05	0.025	0.0125	µg CBC-QconCAT				0.2	0.1	0.05	0.025	µg CBC-QconCAT
		UVM4	27.6487	1.73102		361680		≡ fmol	2086.74	1043.37	521.684	260.842				≡ fmol	4173.47	2086.74	1043.37	521.684
		HA5	25.8317	0.513853		387122
		HA11	26.7233	3.85716		374205
		St1	30.725	0.666054		325468
		St12	28.0719	2.62779		356228
			Ratio 14N native peptide / 15N Q-peptide										Ratio 14N/15N * amount of Q-prot added
		µg QP	0.1/0.2	0.05/0.1	0.025/0.05	0.0125/0.025			TPI1 [Da]	27165.9		µg QP	fmol/µg cell prot				Mean	SD	Median	amol/cell (from mean)	SD	amol/cell (from median)	molecules/cell (from median)	% of total proteins	Conc [µM] in chloroplast
UVM4	LVDELNAGTIPR	A	0.0298057	0.0571278	0.110871	0.207964				UVM4	LVDELNAGTIPR	A	6.21967	5.96053	5.78398	5.42457
		B		0.0629039	0.163618	0.380263						B		6.56319	8.53568	9.91885
		C	0.0312476	0.0715713	0.187307	0.39134						C	6.52056	7.46753	9.77153	10.2078
		D	0.0244053	0.0542766	0.138999	0.26957						D	10.1855	11.3261	14.5027	14.063
		E	0.0229398	0.0395774	0.146742	0.257059						E	9.57387	8.25876	15.3106	13.4104
		F	0.0254883	0.0570391	0.138816	0.268942						F	10.6375	11.9026	14.4837	14.0303	10.0026	3.19011		0.276558	0.0882025
	SLFGESNEVVAK	A	0.0318374	0.0710539	0.148694	0.303452					SLFGESNEVVAK	A	6.64363	7.41354	7.75713	7.9153
		B	0.0331628	0.0766089	0.219689	0.396119						B	6.9202	7.99313	11.4608	10.3325
		C	0.0368481	0.0781208	0.1981	0.402901						C	7.68922	8.15087	10.3346	10.5094
		D		0.0924249	0.244572	0.441046						D		19.2866	25.5178	23.0087
		E	0.0449665	0.0915522	0.264027							E	18.7667	19.1045	27.5477
		F		0.110586	0.283246							F		23.0764	29.553		14.4491	7.85924		0.399499	0.217298
		A										A
		B										B
		C										C
		D										D
		E										E
		F										F					#DIV/0!	#DIV/0!	10.2078	#DIV/0!	#DIV/0!	0.282233	169964	0.0277304	2.09061
HA5	LVDELNAGTIPR	A	0.0421281	0.0789674	0.240701	0.38426				HA5	LVDELNAGTIPR	A	8.79103	8.23921	12.557	10.0231
		B	0.0304716	0.0698248	0.177463	0.202071						B	6.35863	7.28531	9.25799	5.27087
		C	0.0390066	0.093902	0.169443	0.23613						C	8.13966	9.79744	8.8396	6.15927
		D	0.0219233	0.0429547	0.12177	0.243533						D	9.14961	8.96352	12.7051	12.7047
		E	0.0281069	0.0460746	0.118572	0.253985						E	11.7304	9.61456	12.3714	13.25
		F	0.0244705	0.0438559	0.117624	0.244023						F	10.2127	9.15157	12.2726	12.7303	9.81565	2.30851		0.253555	0.0596327
	SLFGESNEVVAK	A	0.0434657	0.079284		0.443279					SLFGESNEVVAK	A	9.07014	8.27224		11.5626
		B	0.0305133	0.0731712	0.190867	0.325493						B	6.36733	7.63446	9.95725	8.49023
		C	0.0404155	0.0909906	0.173788	0.273554						C	8.43366	9.49367	9.06624	7.13543
		D										D
		E										E
		F										F					8.68029	1.41402		0.224227	0.0365264
		A										A
		B										B
		C										C
		D										D
		E										E
		F										F					#DIV/0!	#DIV/0!	9.14961	#DIV/0!	#DIV/0!	0.23635	142333	0.0248558
HA11	LVDELNAGTIPR	A	0.0351738	0.0814446	0.174616	0.333947				HA11	LVDELNAGTIPR	A	7.33985	8.49768	9.10945	8.71075
		B	0.0306833	0.0783973	0.163545	0.385841						B	6.4028	8.17973	8.53186	10.0644
		C	0.0343382	0.0737472	0.180996	0.445524						C	7.16548	7.69455	9.44227	11.6212
		D	0.0218296	0.0426519	0.121835	0.21976						D	9.11052	8.90033	12.7119	11.4646
		E	0.025748	0.0293854	0.136347	0.245924						E	10.7458	6.13197	14.226	12.8295
		F	0.0246382	0.0460594	0.115895	0.272243						F	10.2827	9.6114	12.0921	14.2025	9.79455	2.29014		0.261743	0.0612
	SLFGESNEVVAK	A	0.0355813	0.0803323	0.189942	0.420456					SLFGESNEVVAK	A	7.42487	8.38162	9.90897	10.9673
		B	0.0387098	0.0873243	0.188869	0.414013						B	8.07772	9.11114	9.853	10.7992
		C	0.0377181	0.0620535	0.184517	0.431013						C	7.87078	6.47446	9.62597	11.2426
		D										D
		E										E
		F										F					9.1448	1.51389		0.24438	0.0404562
		A										A
		B										B
		C										C
		D										D
		E										E
		F										F					#DIV/0!	#DIV/0!	9.27671	#DIV/0!	#DIV/0!	0.247904	149292	0.025201
St1	LVDELNAGTIPR	A	0.035183	0.0903576	0.198427					St1	LVDELNAGTIPR	A	7.34177	9.42763	10.3516
		B	0.0401306	0.102439	0.212114	0.431899						B	8.3742	10.6882	11.0657	11.2658
		C	0.0338178	0.0865228	0.182937	0.395781						C	7.05689	9.02752	9.54355	10.3236
		D	0.0293612	0.056684	0.14512	0.284954						D	12.2538	11.8285	15.1414	14.8656
		E	0.0301315	0.0565818	0.151573	0.317285						E	12.5753	11.8071	15.8147	16.5523
		F	0.0273075	0.0550867	0.13969	0.369165						F	11.3967	11.4951	14.5748	19.2588	11.8274	3.03388		0.363397	0.0932158
	SLFGESNEVVAK	A	0.0346164	0.0857583	0.185943						SLFGESNEVVAK	A	7.22353	8.94775	9.70037
		B	0.0430576	0.0980553	0.243907	0.498408						B	8.98498	10.2308	12.7242	13.0006
		C	0.0323646	0.0820353	0.193511	0.34527						C	6.75363	8.55931	10.0951	9.00609
		D			0.281856	0.533487						D			29.408	27.8312
		E										E
		F										F					12.4973	7.37997		0.383981	0.226749
		A										A
		B										B
		C										C
		D										D
		E										E
		F										F					#DIV/0!	#DIV/0!	10.8769	#DIV/0!	#DIV/0!	0.334193	201256	0.0295481
St12	LVDELNAGTIPR	A	0.0364603	0.0771969	0.23764	0.438087				St12	LVDELNAGTIPR	A	7.6083	8.05448	12.3973	11.4271
		B	0.0357853	0.144546	0.210206	0.425256						B	7.46745	15.0814	10.9661	11.0925
		C	0.0335458	0.0768673	0.193349	0.349486						C	7.00012	8.0201	10.0867	9.11606
		D	0.022545	0.050805	0.130691	0.218622						D	9.40911	10.6017	13.6359	11.4052
		E	0.0244811	0.0461856	0.127535	0.255552						E	10.2171	9.63772	13.3066	13.3317
		F	0.0249129	0.0453539	0.124524	0.237587						F	10.3973	9.46417	12.9925	12.3945	10.6296	2.17792		0.298394	0.0611383
	SLFGESNEVVAK	A	0.0378593	0.0799692	0.208286	0.463602					SLFGESNEVVAK	A	7.90025	8.34374	10.866	12.0927
		B	0.0354168	0.087616	0.217348	0.46257						B	7.39056	9.14157	11.3387	12.0658
		C	0.0372264	0.073833	0.182762	0.376791						C	7.76816	7.7035	9.53439	9.8283
		D										D
		E										E
		F										F					9.4978	1.74152		0.266621	0.0488878
		A										A
		B										B
		C										C
		D										D
		E										E
		F										F					#DIV/0!	#DIV/0!	10.1519	#DIV/0!	#DIV/0!	0.284984	171621	0.0275786

[truncated: 3 more sheets: SBP1, RbcL, RBCS]
